# Supplementary material
Source: MDPI journal article supplement (https://www.mdpi.com/2073-4344/11/10/1246)
Supplement: s1 [file s1]

## Supplementary material

# Pt Electrocatalyst Prepared by Hydrothermal Reduction onto the Gas Diffusion Layer for High-Temperature Formic Acid and Ethanol Fuel PEMFC

Rayane da Silva Cardoso <sup>1</sup>, Bruna Sartório de Castro <sup>1</sup>, Sophya de Andrade Dias <sup>1</sup>,  
Maria Clara H. Clemente <sup>1</sup>, Sílvia C.L. Dias <sup>1</sup>, José A. Dias <sup>1</sup>, Rudy Crisafulli <sup>1</sup>,  
José J. Linares <sup>2</sup> and Gesley A. Veloso Martins <sup>1</sup>

More SEM images are next presented under different hydrothermal reductive conditions

- Image of the FA160300 (Figure S1) electrode that presented the biggest crystallite size. As can be observed, the structure of the Pt particles is similar to the FA120200.

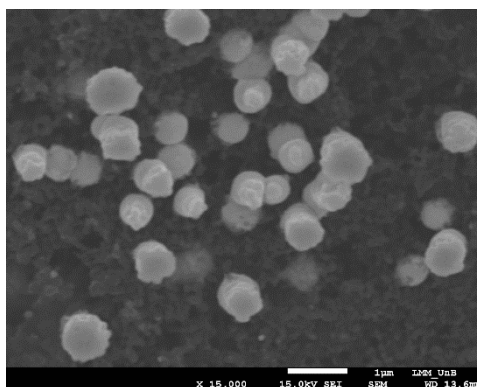

**Figure S1.** SEM image of the FA160300

- Image of the FA160100 (Figure S2). As in Fig. S1, the structure resembles to Fig. S1 and FA120200.

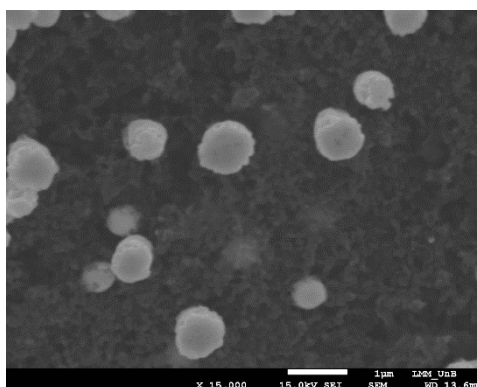

**Figure S2.** SEM image of the FA160300

- Image of the EG200300 (Figure S3) electrode that presented the biggest crystallite size for the EG materials. The structure resembles to EG160200, with a slightly larger agglomeration.

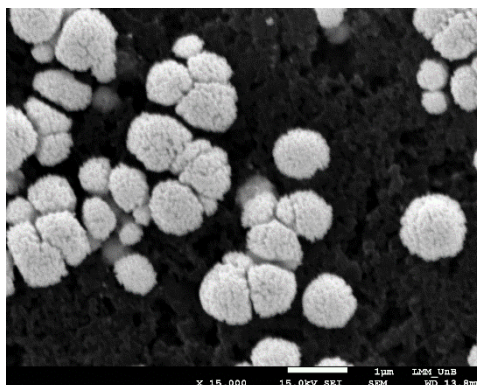

**Figure S3.** SEM image of the EG200300

- Image of the EG200200 (Figure S4) electrode that also presented a large crystallite size. The structure resembles to EG160200 and Fig. S3, with a slightly larger agglomeration.

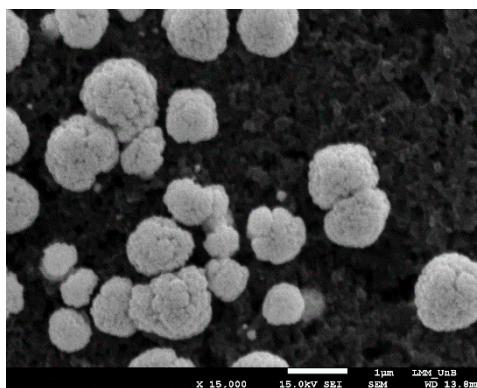

**Fig. S4.** SEM image of the EG200200

- Image of the ET160100 (Figure S5) electrode that presented the biggest crystallite size. As can be observed, the structure of the Pt particles is similar to the ET120300.

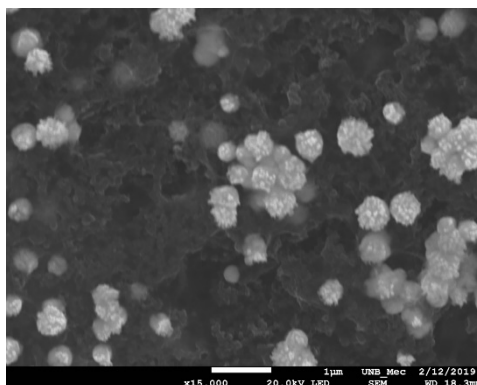

**Figure S5.** SEM image of the ET160100

- Image of the ET160300 (Figure S6) electrode that also presented a large crystallite size. The structure resembles to ET120300 and Fig. S5, with a slightly larger agglomeration.

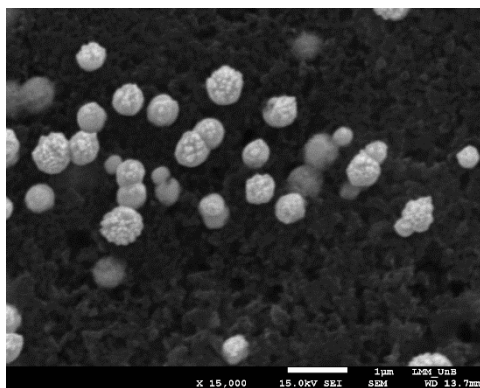

**Figure S6.** SEM image of the ET160300
